# Supplementary material
Source: publisher site journal article supplement (https://spandidos-publications.com/2016/downloadSupplementary)

Figure S1. Phenotype identification of BMSCs. The percentages of BMSCs expressing (A) CD34, (B) CD44, (C) CD29 and (D) CD90 were 1.3, 1.8, 97.6 and 93.9%, respectively. BMSC, bone marrow stromal cells; CD, cluster of differentiation.

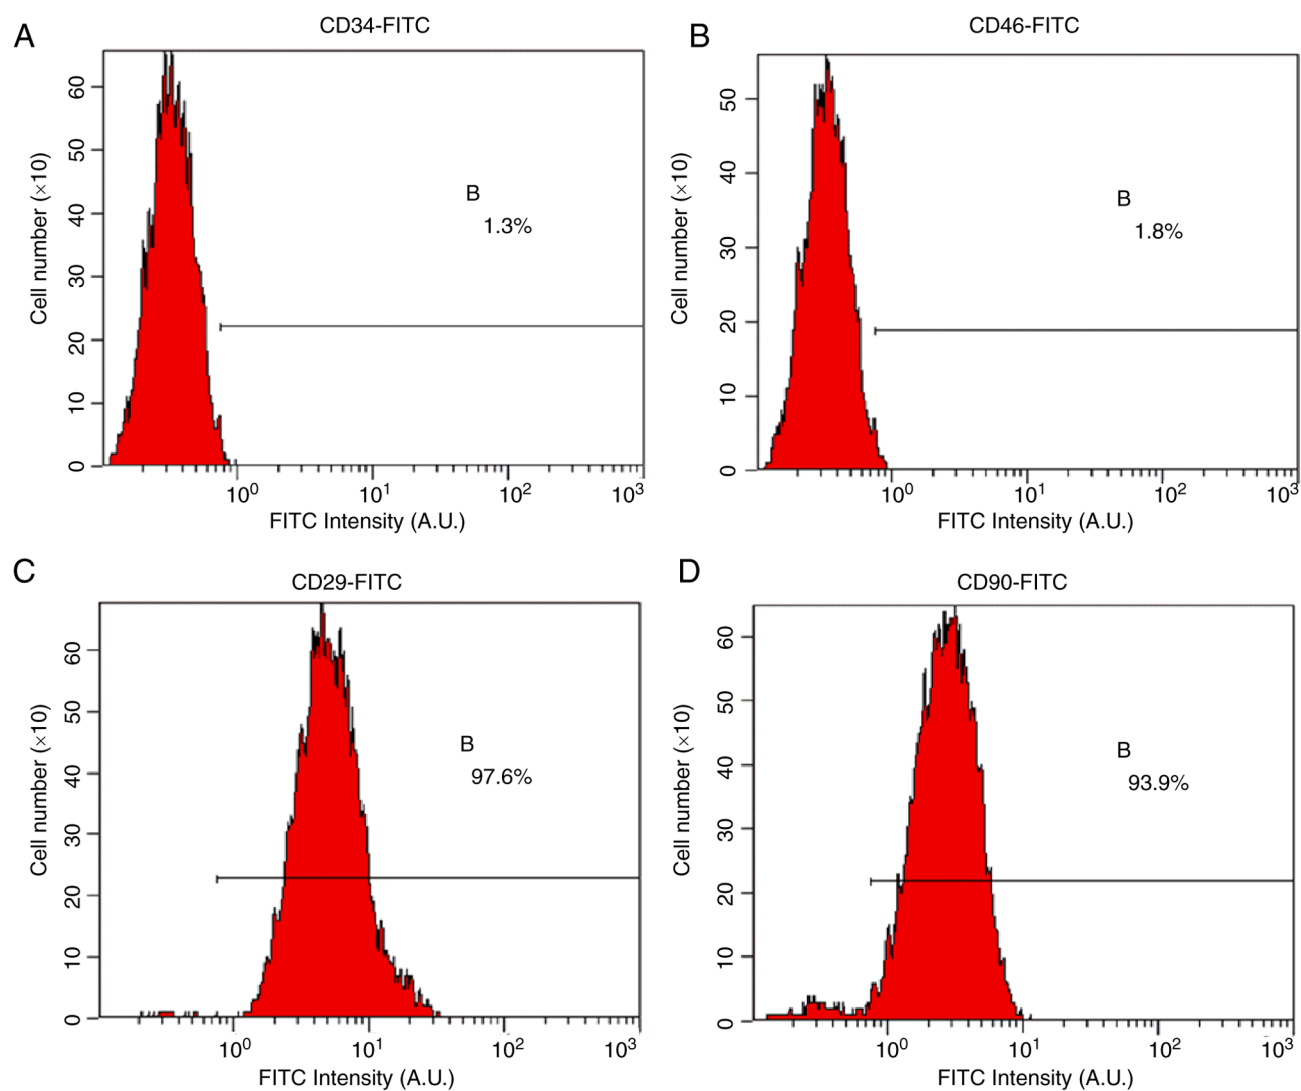

Supplement: Supplementary file 1 [file downloadSupplementary]
